# Supplementary material for: Heterogeneity of IFN-Mediated Responses and Tumor Immunogenicity in Patients with Cervical Cancer Receiving Concurrent Chemoradiotherapy
Source: Oxford University Press journal article supplement (doi:10.1158/1078-0432.ccr-20-4521), 2021-03-25
Supplement: 10780432ccr204521-sup-255840_2_supp_6972606_qprc8c.docx [file 10780432ccr204521-sup-255840_2_supp_6972606_qprc8c.docx]

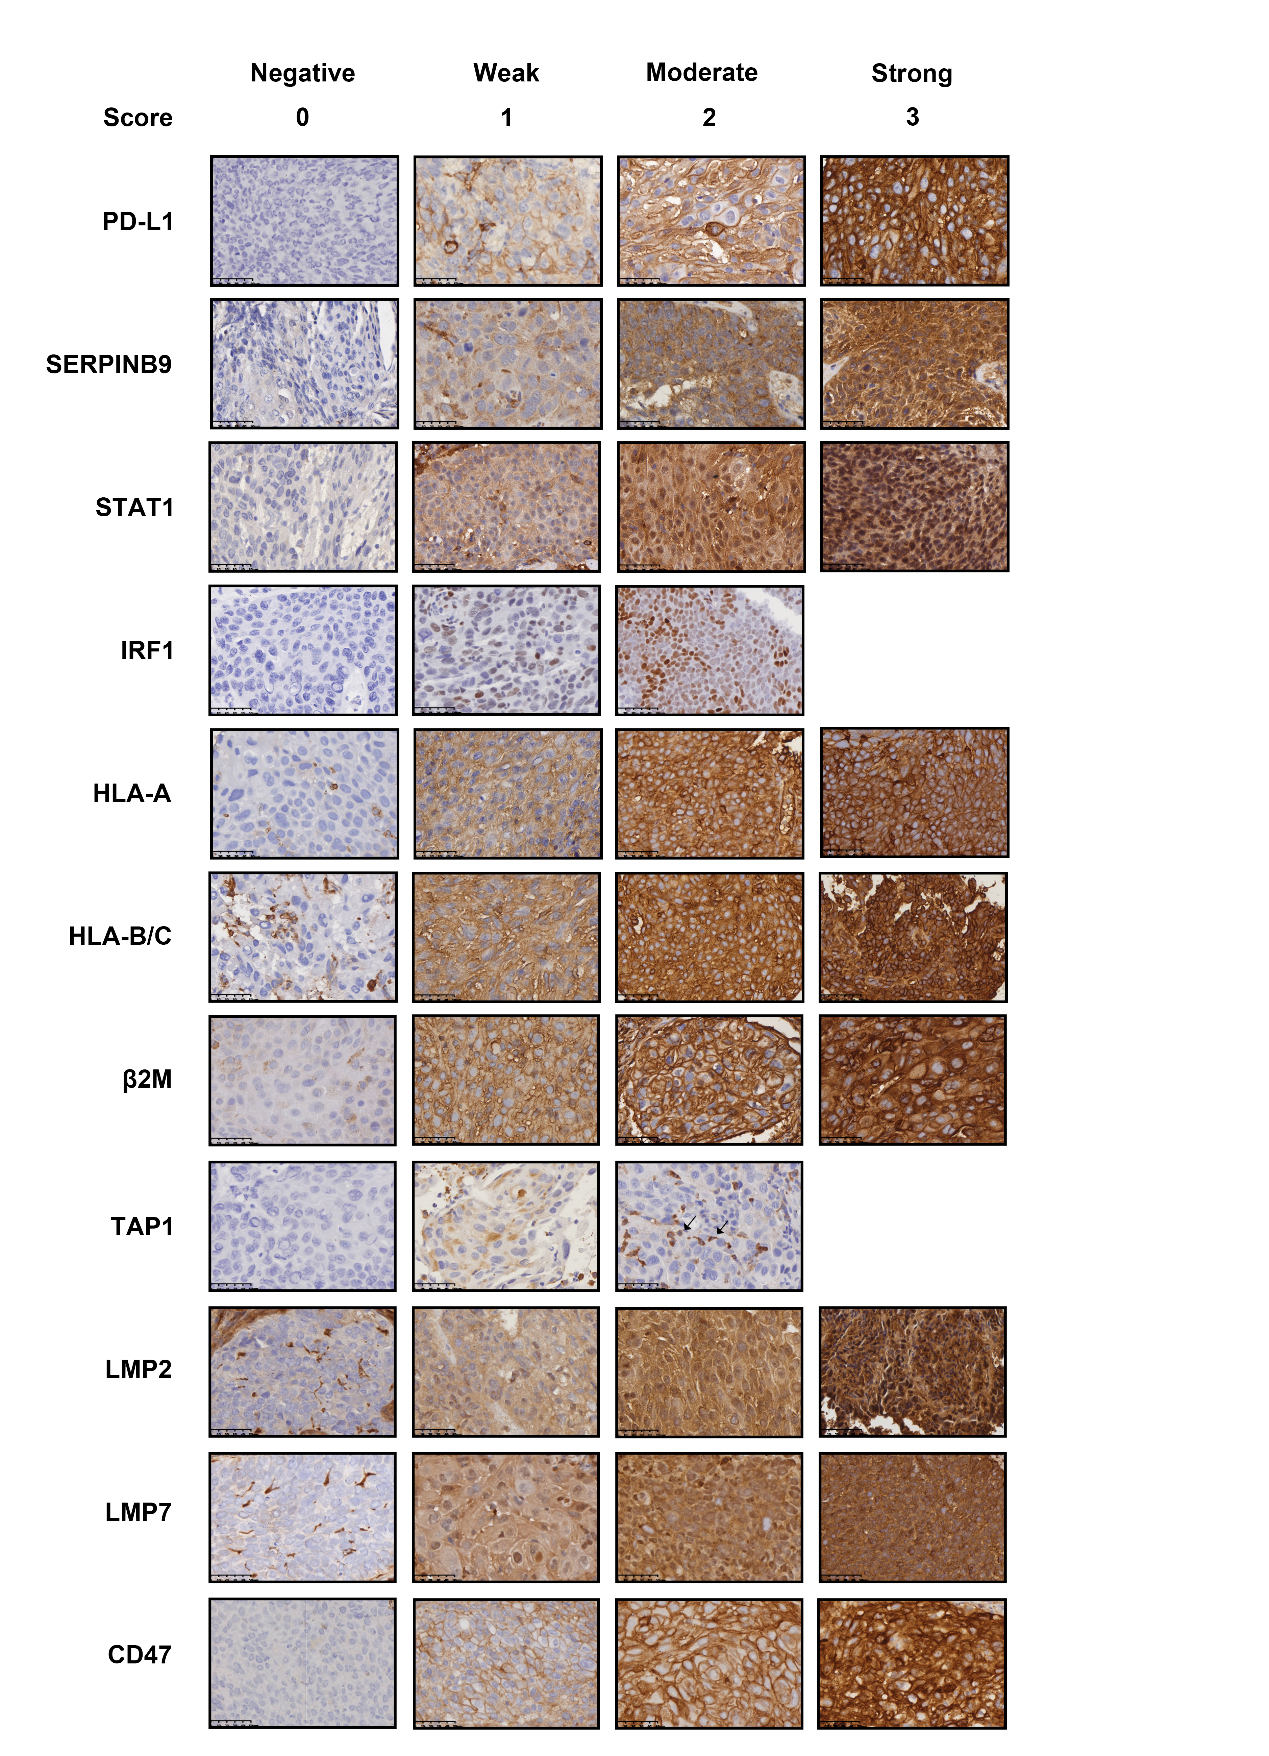


**Figure S1. Representative images for scoring of IHC staining.**

Tumor sections were stained with DAB for targeted markers and counterstained with hematoxylin. Sections were scored according to their intensity: score 0 (negative), score 1 (weak), score 2 (moderate) and score 3 (strong). Moderate staining of TAP1 was only found in infiltrating inflammatory cells as indicated by arrows.


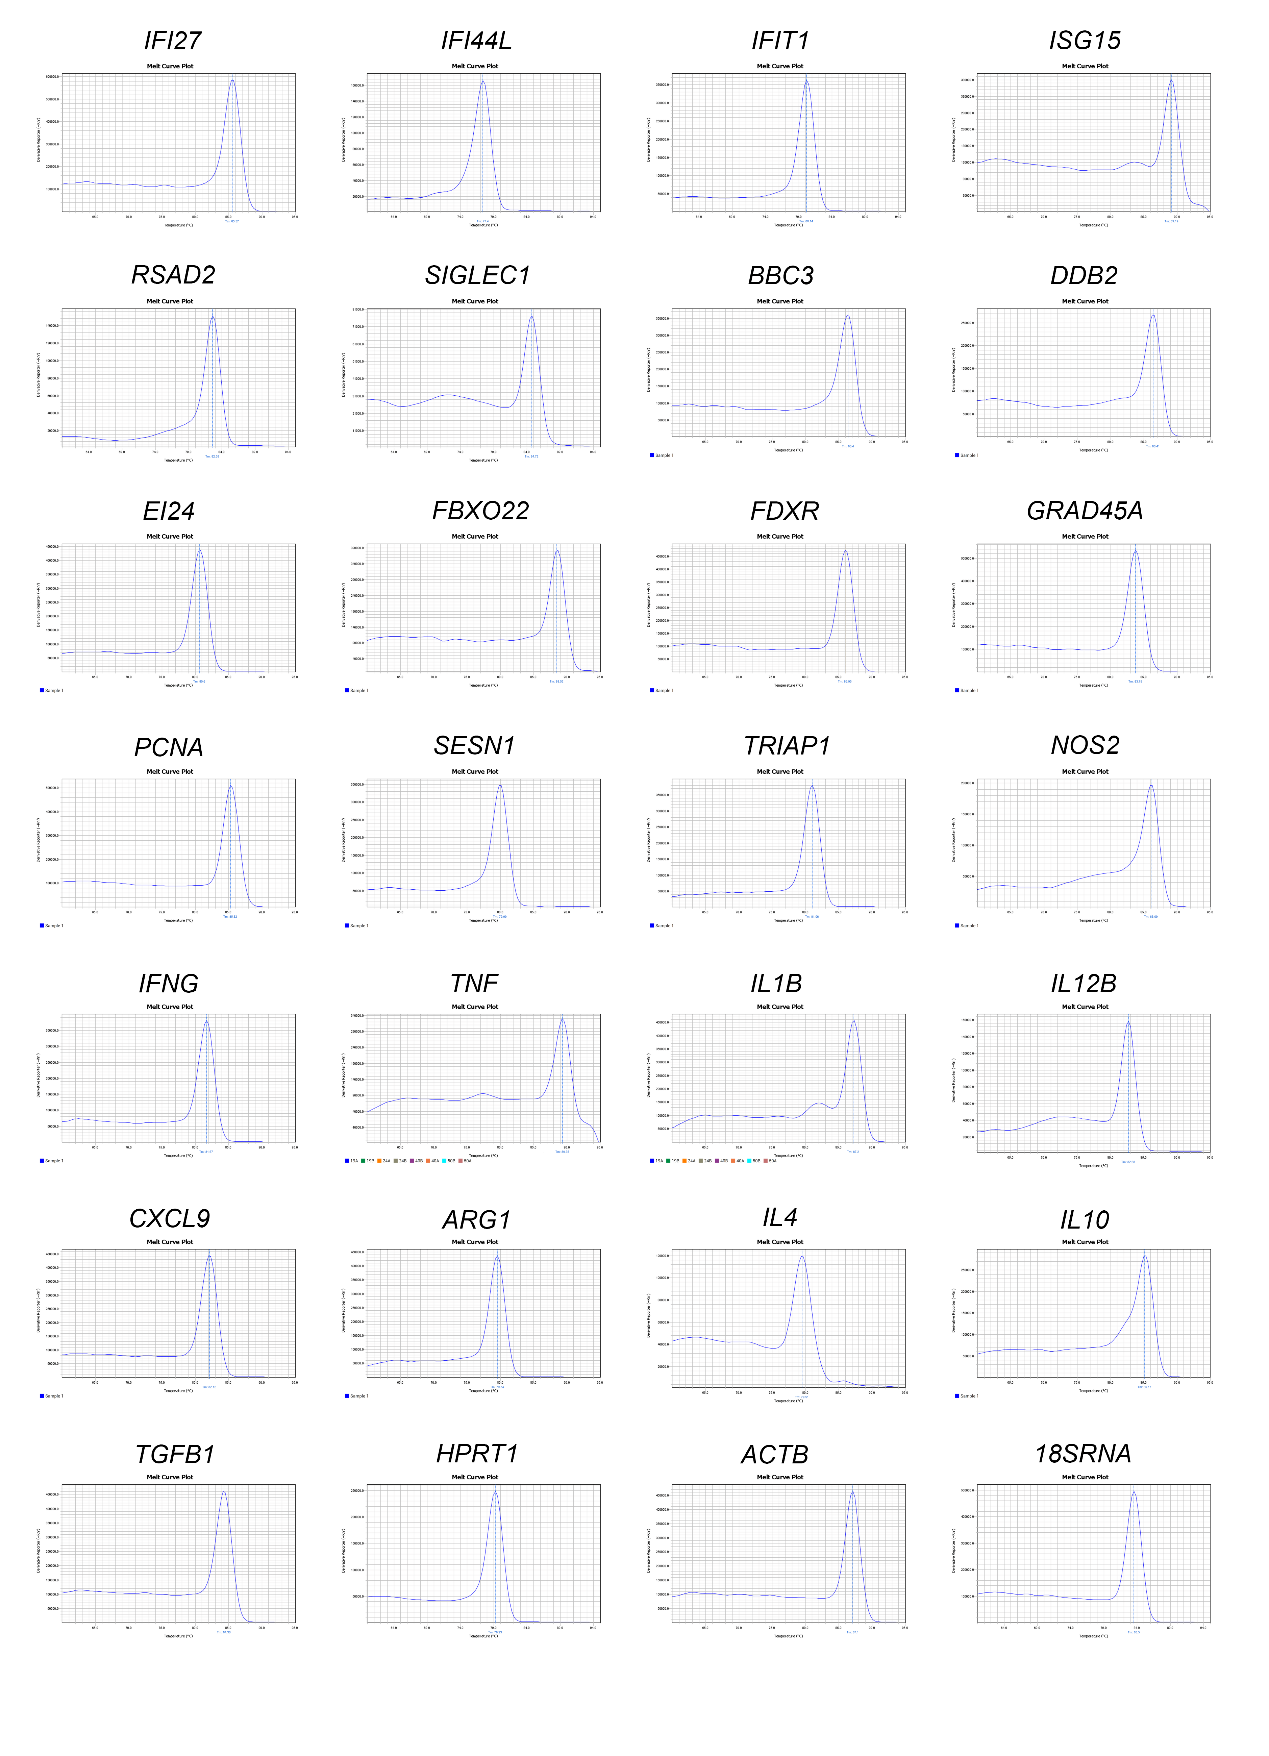


**Figure S2. Melting curve analysis of targeted genes with the paired primers used in this study.**


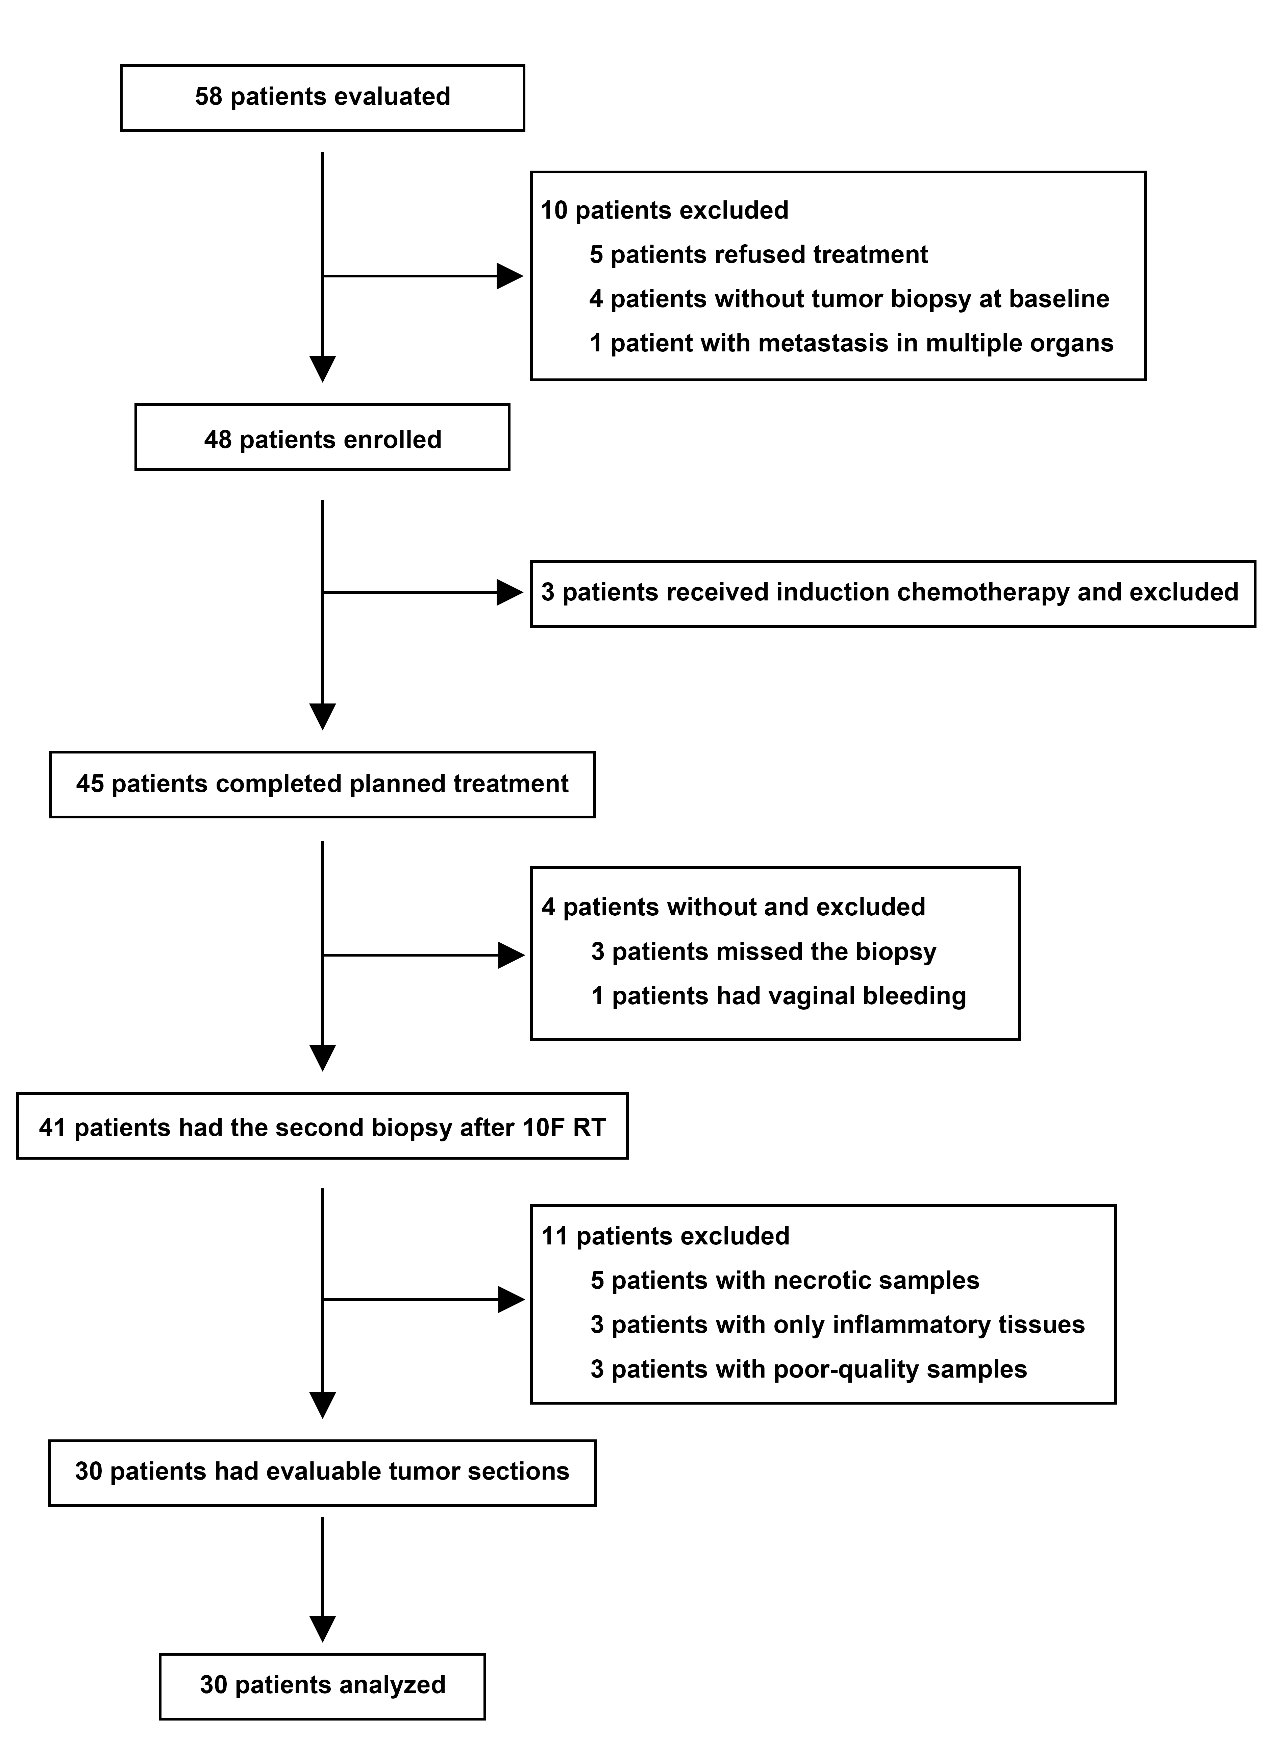


**Figure S3. The clinical trial flow diagram.**

F: fraction; RT: radiotherapy.


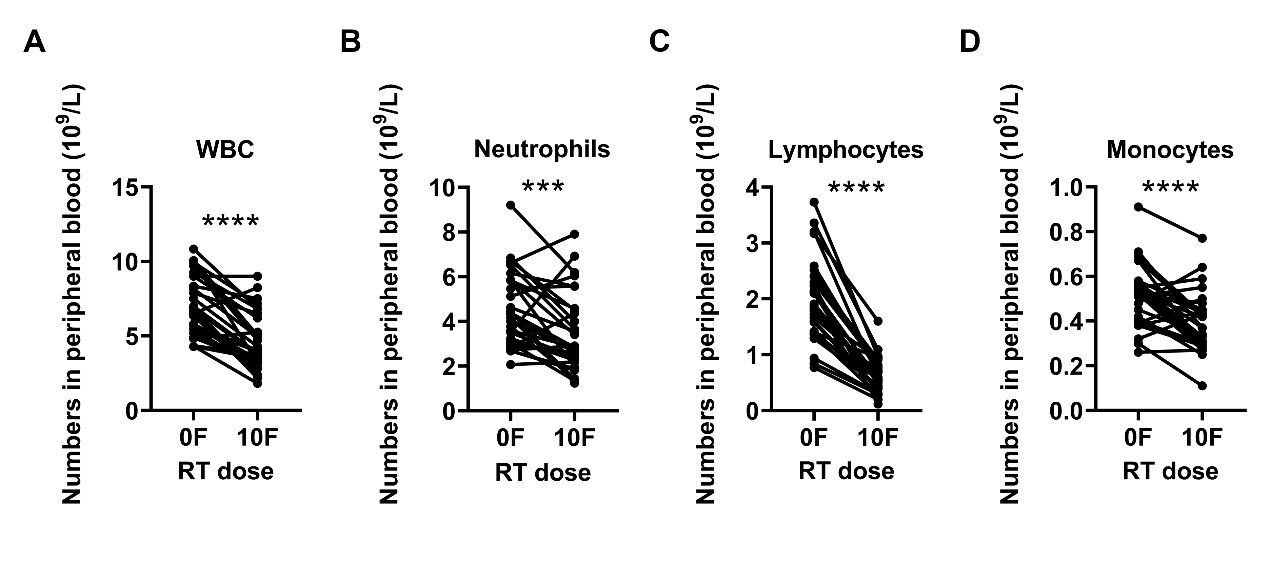


**Figure S4. Changes of immune cells in peripheral blood in patients undergoing CCRT.**

The number of white blood cells (WBC), neutrophils, lymphocytes and monocytes in peripheral blood before and after 10F RT is shown in (A-D) as indicated. N =30.

Mean comparisons were performed by using the paired Student’s t test (*** P < 0.001; **** P < 0.0001).


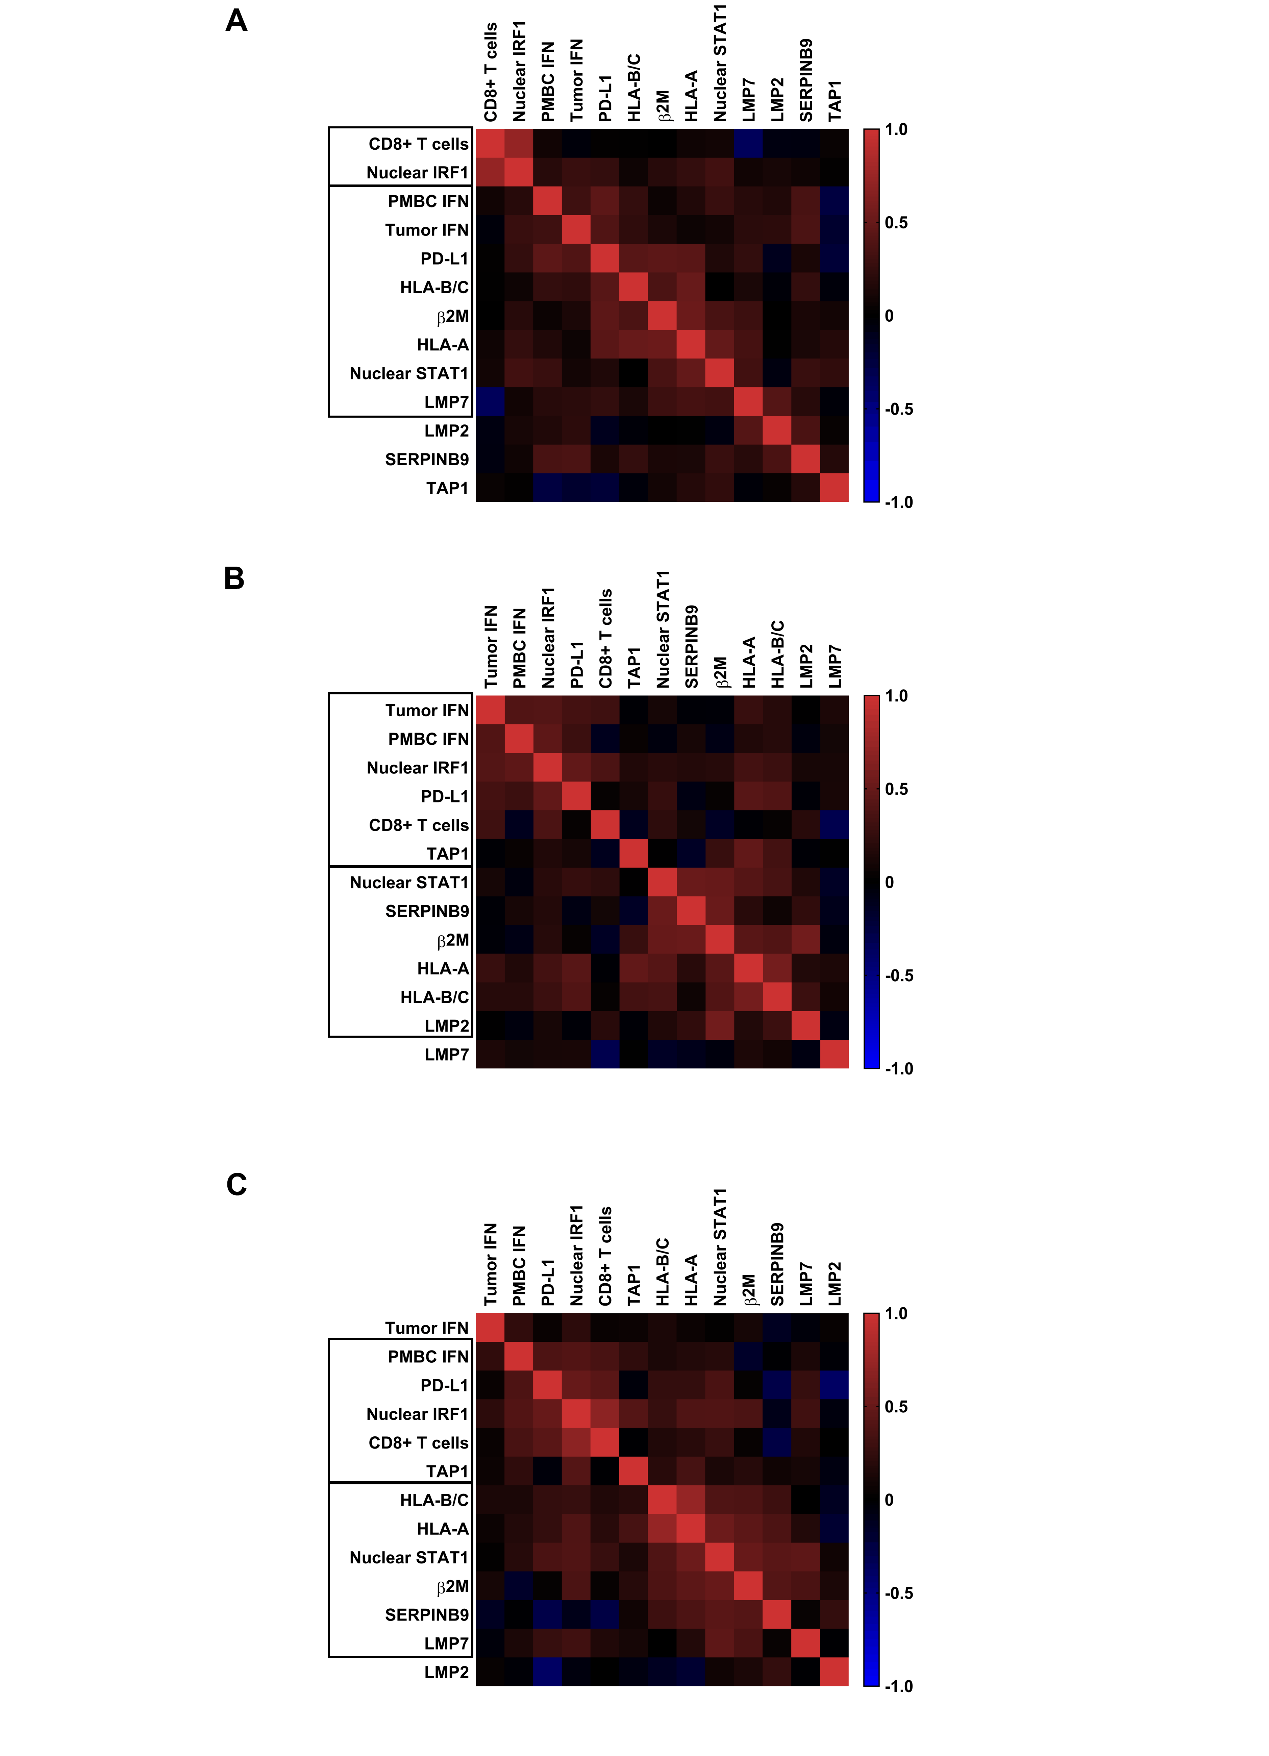


**Figure S5. Heatmap clustering of Pearson correlation coefficients between immune markers (positivity for surface markers)**

(A) Heatmap clustering of Pearson correlation coefficients between the expression of immune markers (positivity for tumor cell surface markers) in patient tumor biopsies before RT.

(B) Heatmap clustering of Pearson correlation coefficients between the expression of immune markers (positivity for tumor cell surface markers) in patient tumor biopsies after 10F RT.

(C) Heatmap clustering of Pearson correlation coefficients between dynamic expression change of immune markers in patient tumor biopsies after 10F RT.

Markers were clustered according to their correlation with the expression of either nuclear IRF1 or STAT1 as indicated.


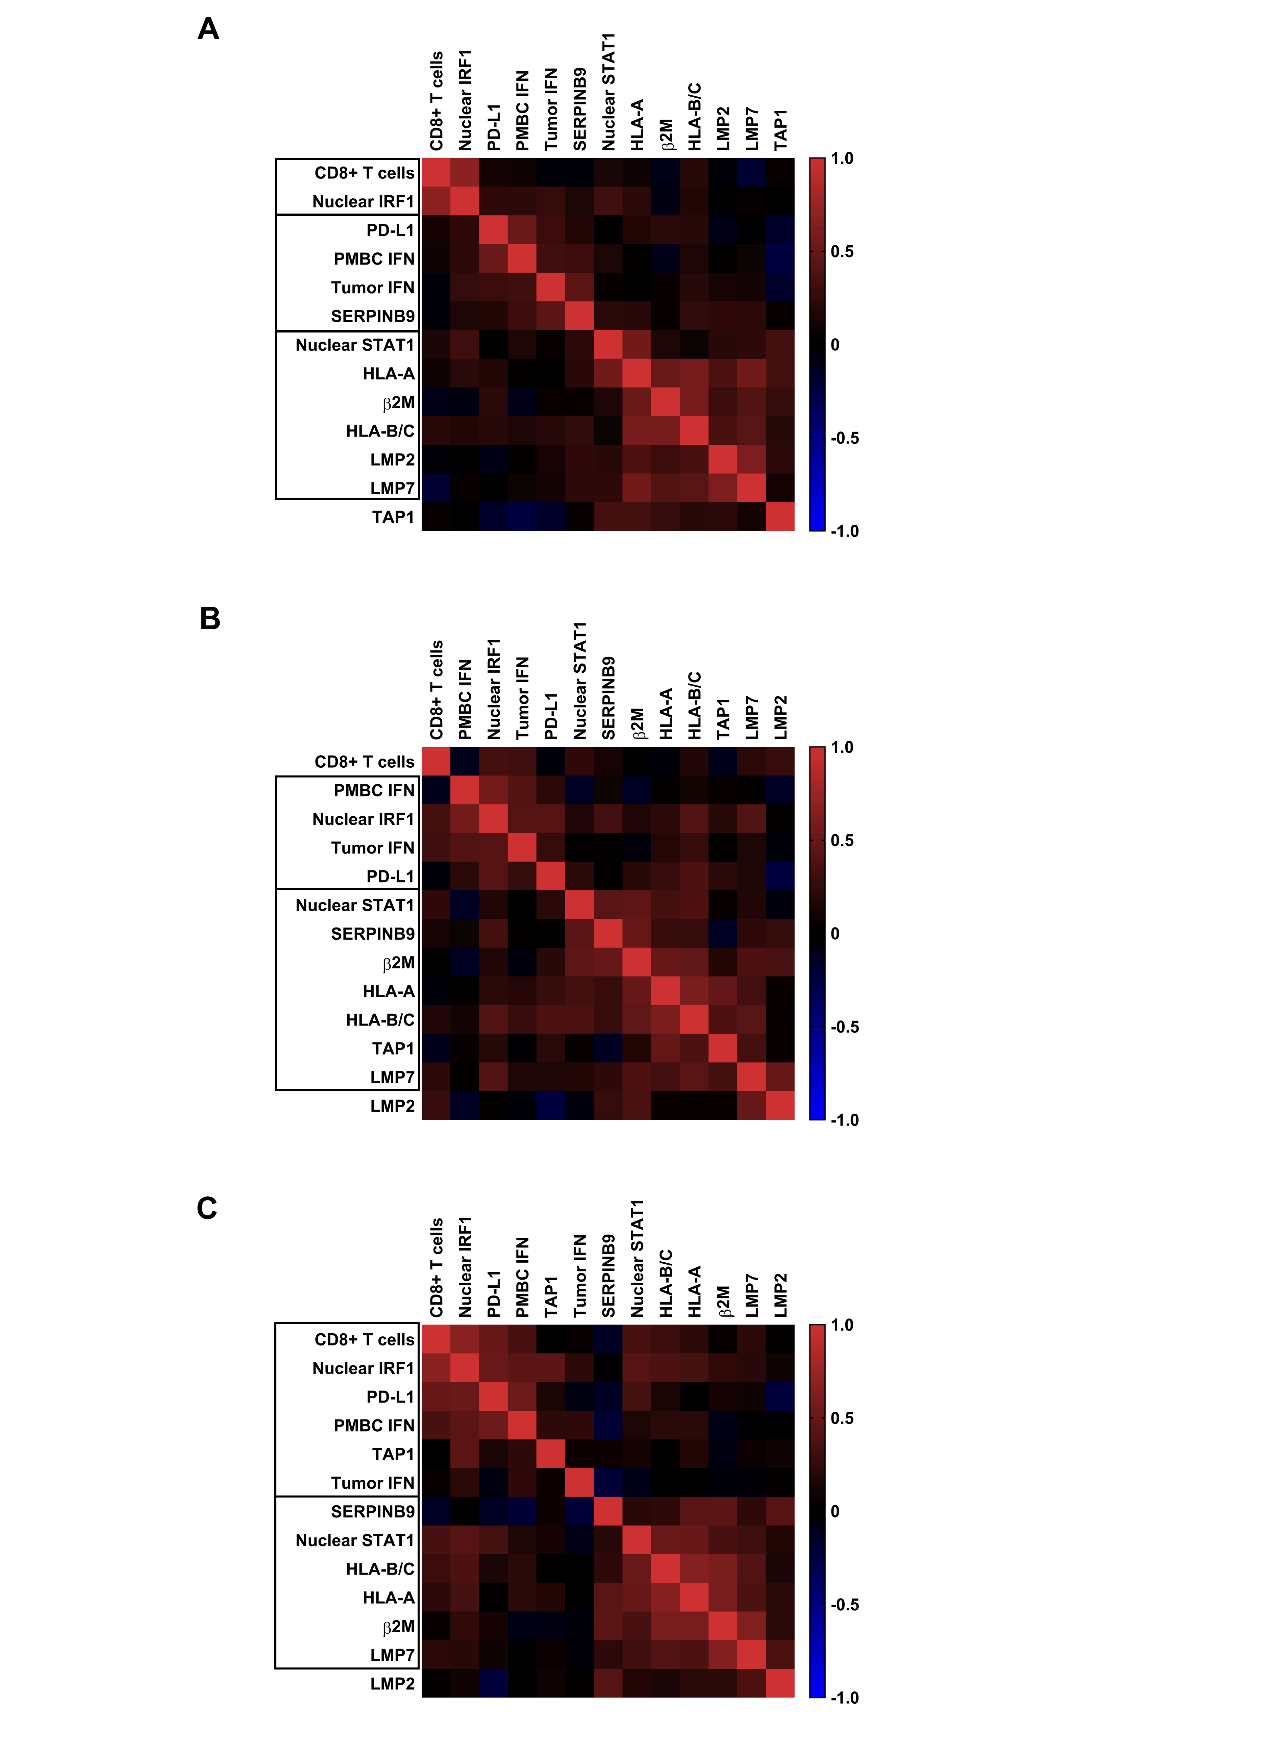


**Figure S6. Heatmap clustering of Pearson correlation coefficients between immune markers (H score for surface markers) in patient tumor biopsies.**

(A) Heatmap clustering of Pearson correlation coefficients between the expression of immune markers (H score for tumor cell surface markers) in patient tumor biopsies before RT.

(B) Heatmap clustering of Pearson correlation coefficients between the expression of immune markers (H score for tumor cell surface markers) in patient tumor biopsies after 10F RT.

(C) Heatmap clustering of Pearson correlation coefficients between dynamic expression change of immune markers in patient tumor biopsies after 10F RT.

Markers were clustered according to their correlation with the expression of either nuclear IRF1 or STAT1 as indicated.


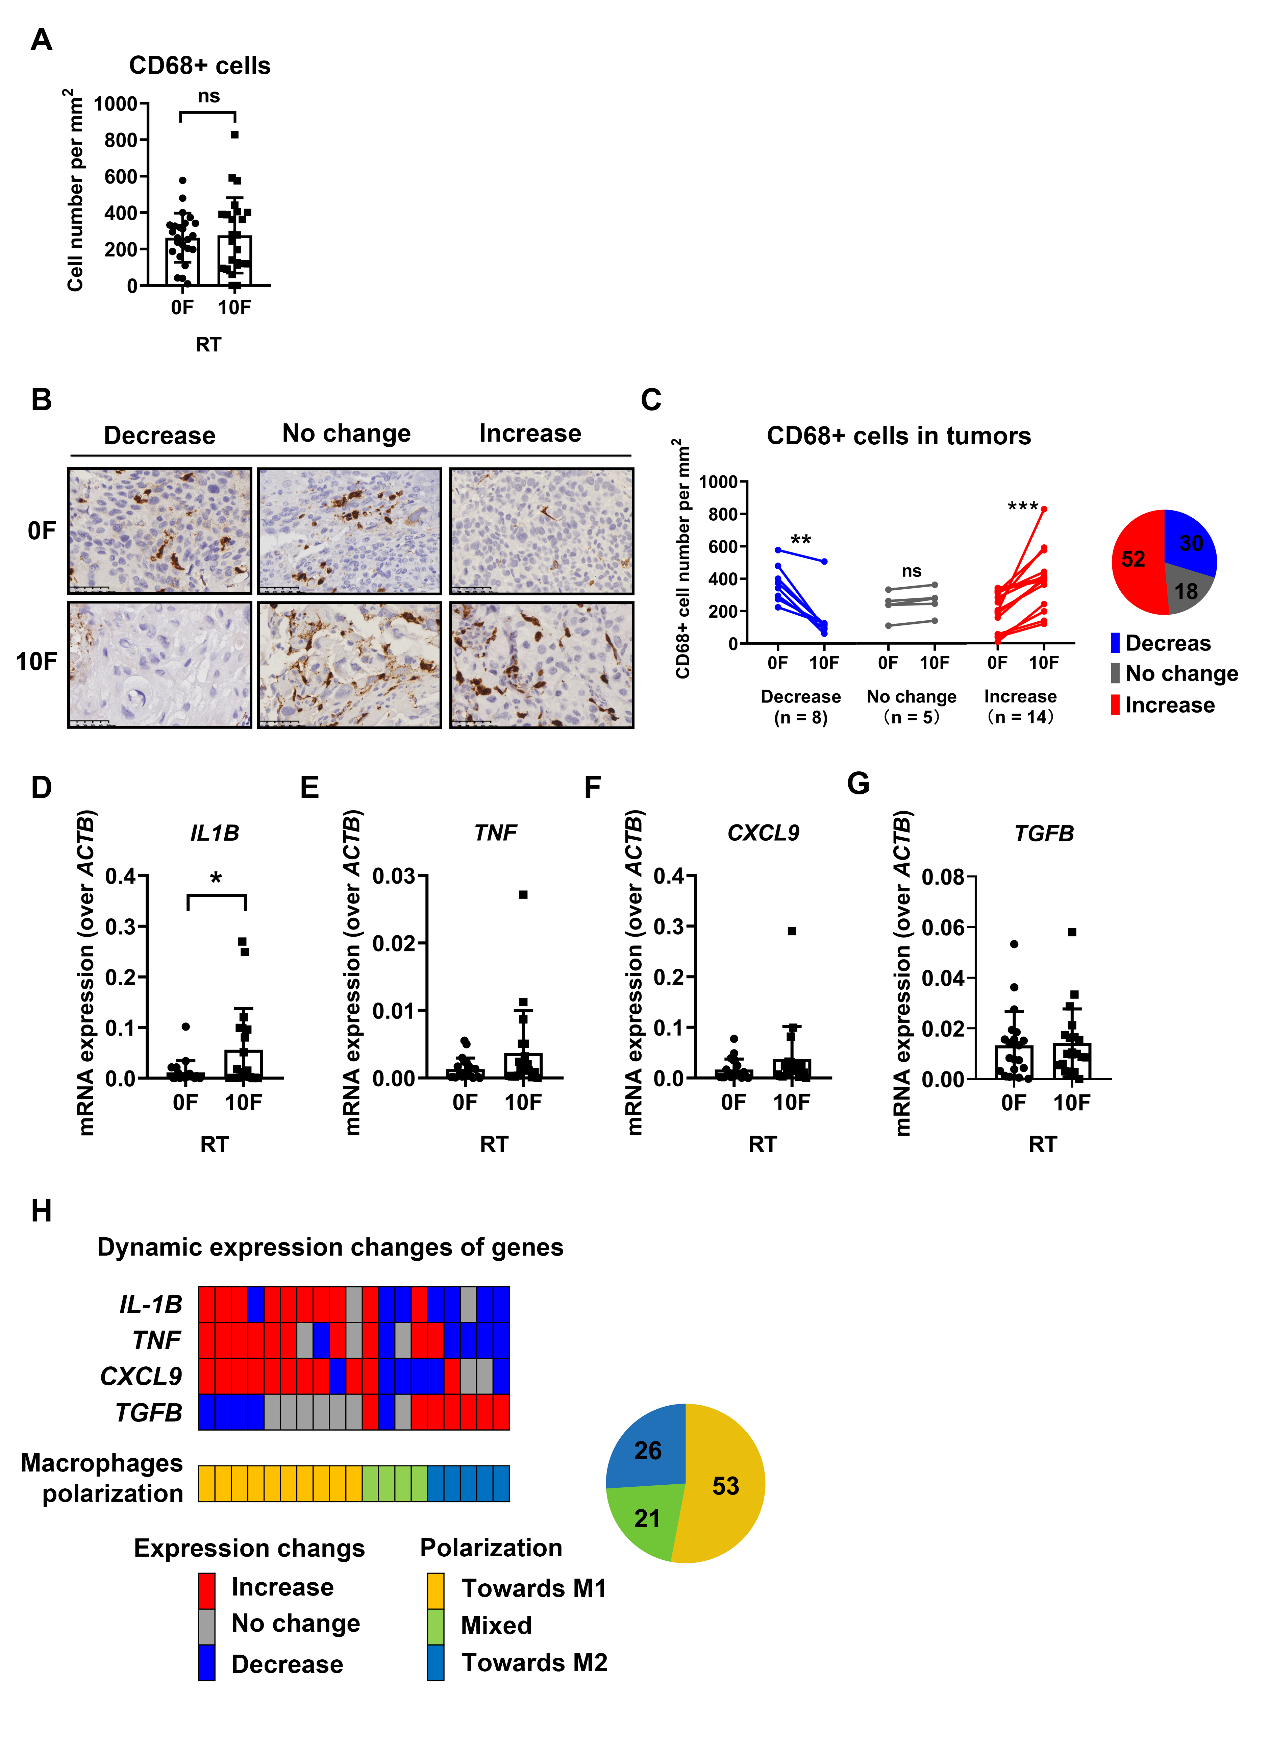


**Figure S7. Tumor infiltrating macrophages and their polarization in patients undergoing CCRT.**

The number of tumor infiltrating CD68+ cells (macrophages) before and after 10F RT is shown in (A). N = 27.

Various dynamic changes (decrease, no change and increase) of tumor infiltrating CD68+ cells: representative immunohistochemical staining in (B), cell number comparison in subgroups of patients with various change patterns and their percentage in (C). N = 27.

The mRNA expression of genes indicative of macrophage polarization (M1: *IL1B*, *TNF* and *CXCL9*; M2: *TGFB*) are summarized in (D-G). N = 19.

(H) On the top panel: heatmap of dynamic change patterns of gene expression (increase in red, no change in gray and decrease in blue). Patients were clustered according to the difference of change patterns between M1 and M2 markers. On the bottom panel: the polarization of macrophages in tumors for each patient are indicated. The percentage of patients with various polarization pattens (towards M1, mixed and towards M2) was shown as a pie chart.

Mean comparisons were performed by using the paired Student’s t test in paired groups with normal distribution (A and D-G) and the Wilcoxon matched-pairs signed rank test in paired groups with uncertain distribution normality (C) (ns: P > 0.05; * P < 0.05; ** P < 0.01; *** P < 0.001; P > 0.05 was not shown in (E-G)).

**
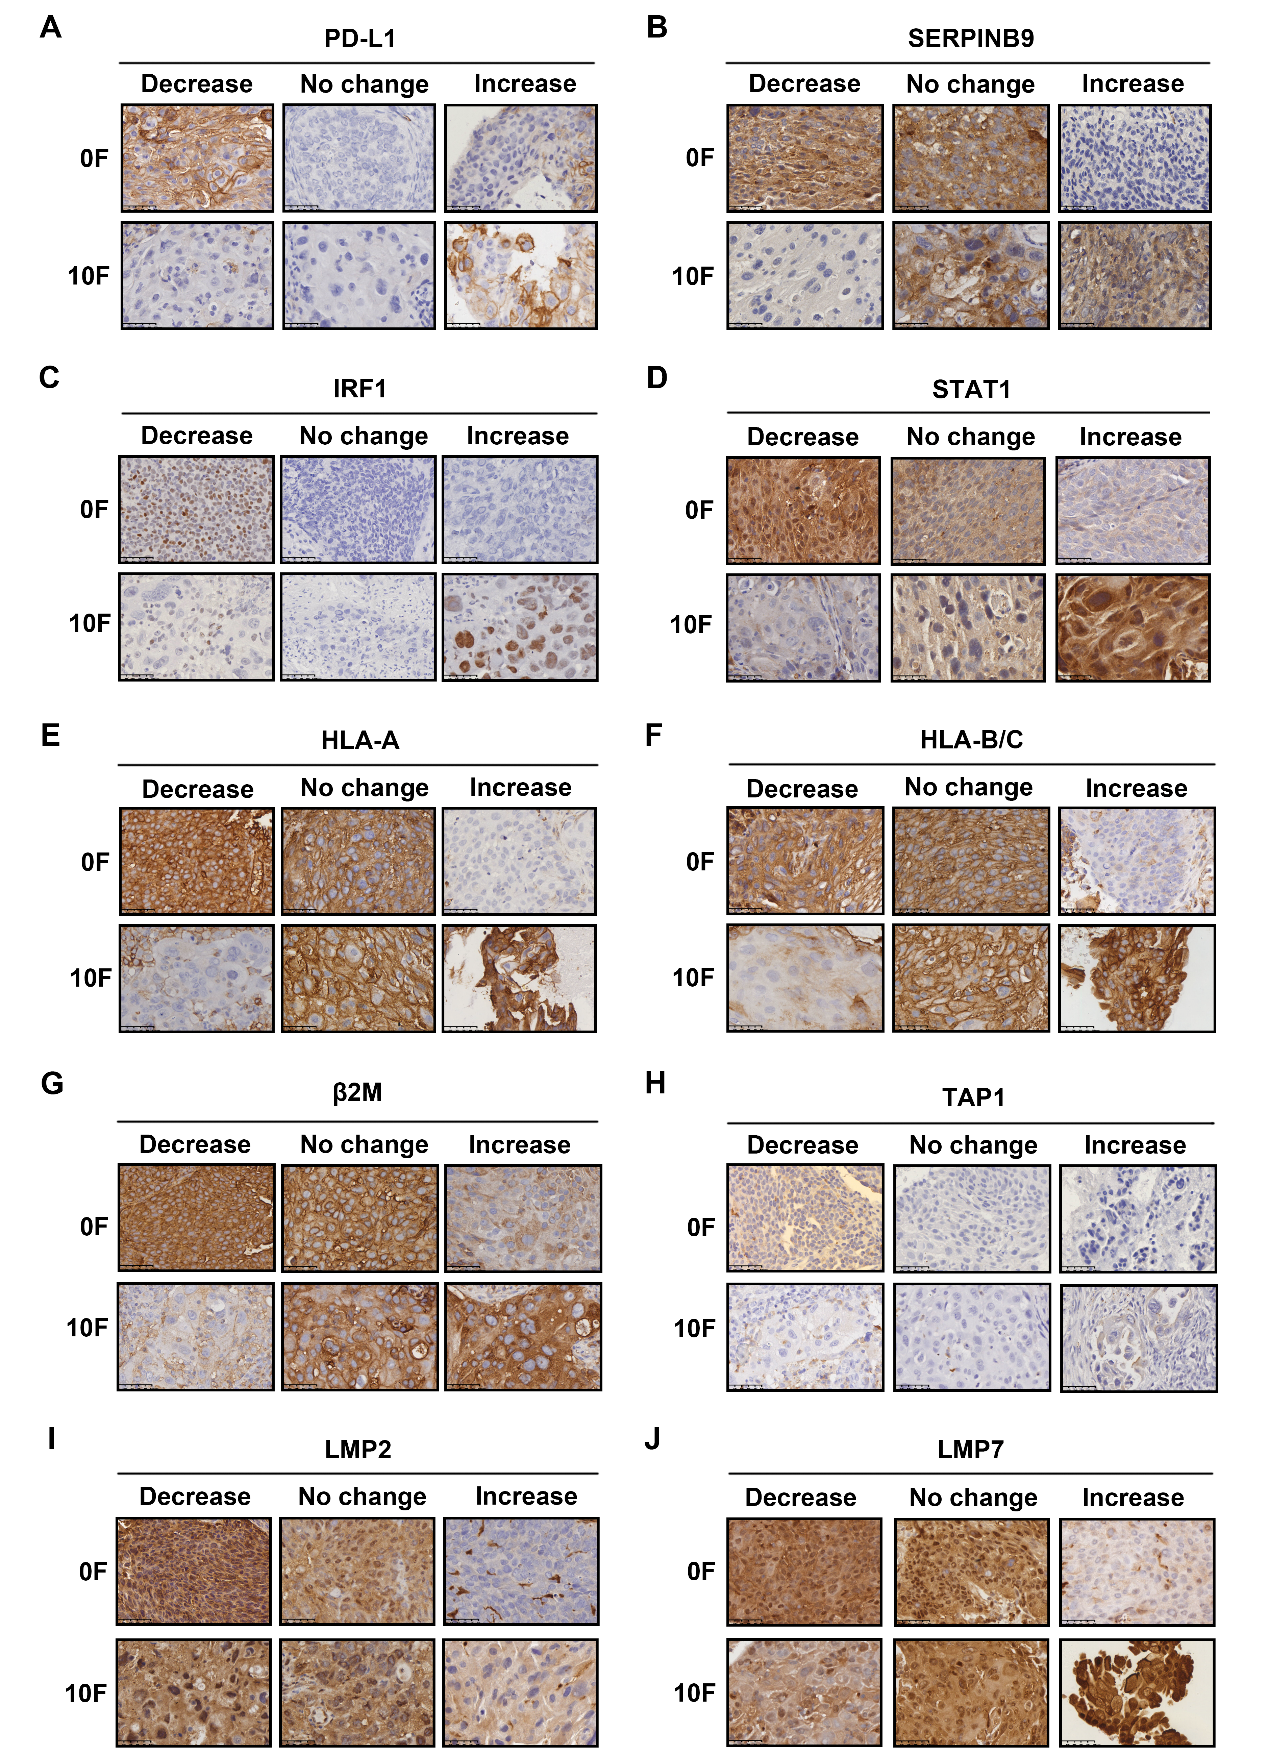
**

**Figure S8. Representative IHC staining of immune markers in tumor sections with various patterns of change.**

Note: tissue sections with moderate staining of PD-L1, STAT1 or HLA-A in Figure S1 are the same as those for illustration of the decreasing expression pattern and to allow direct comparison.


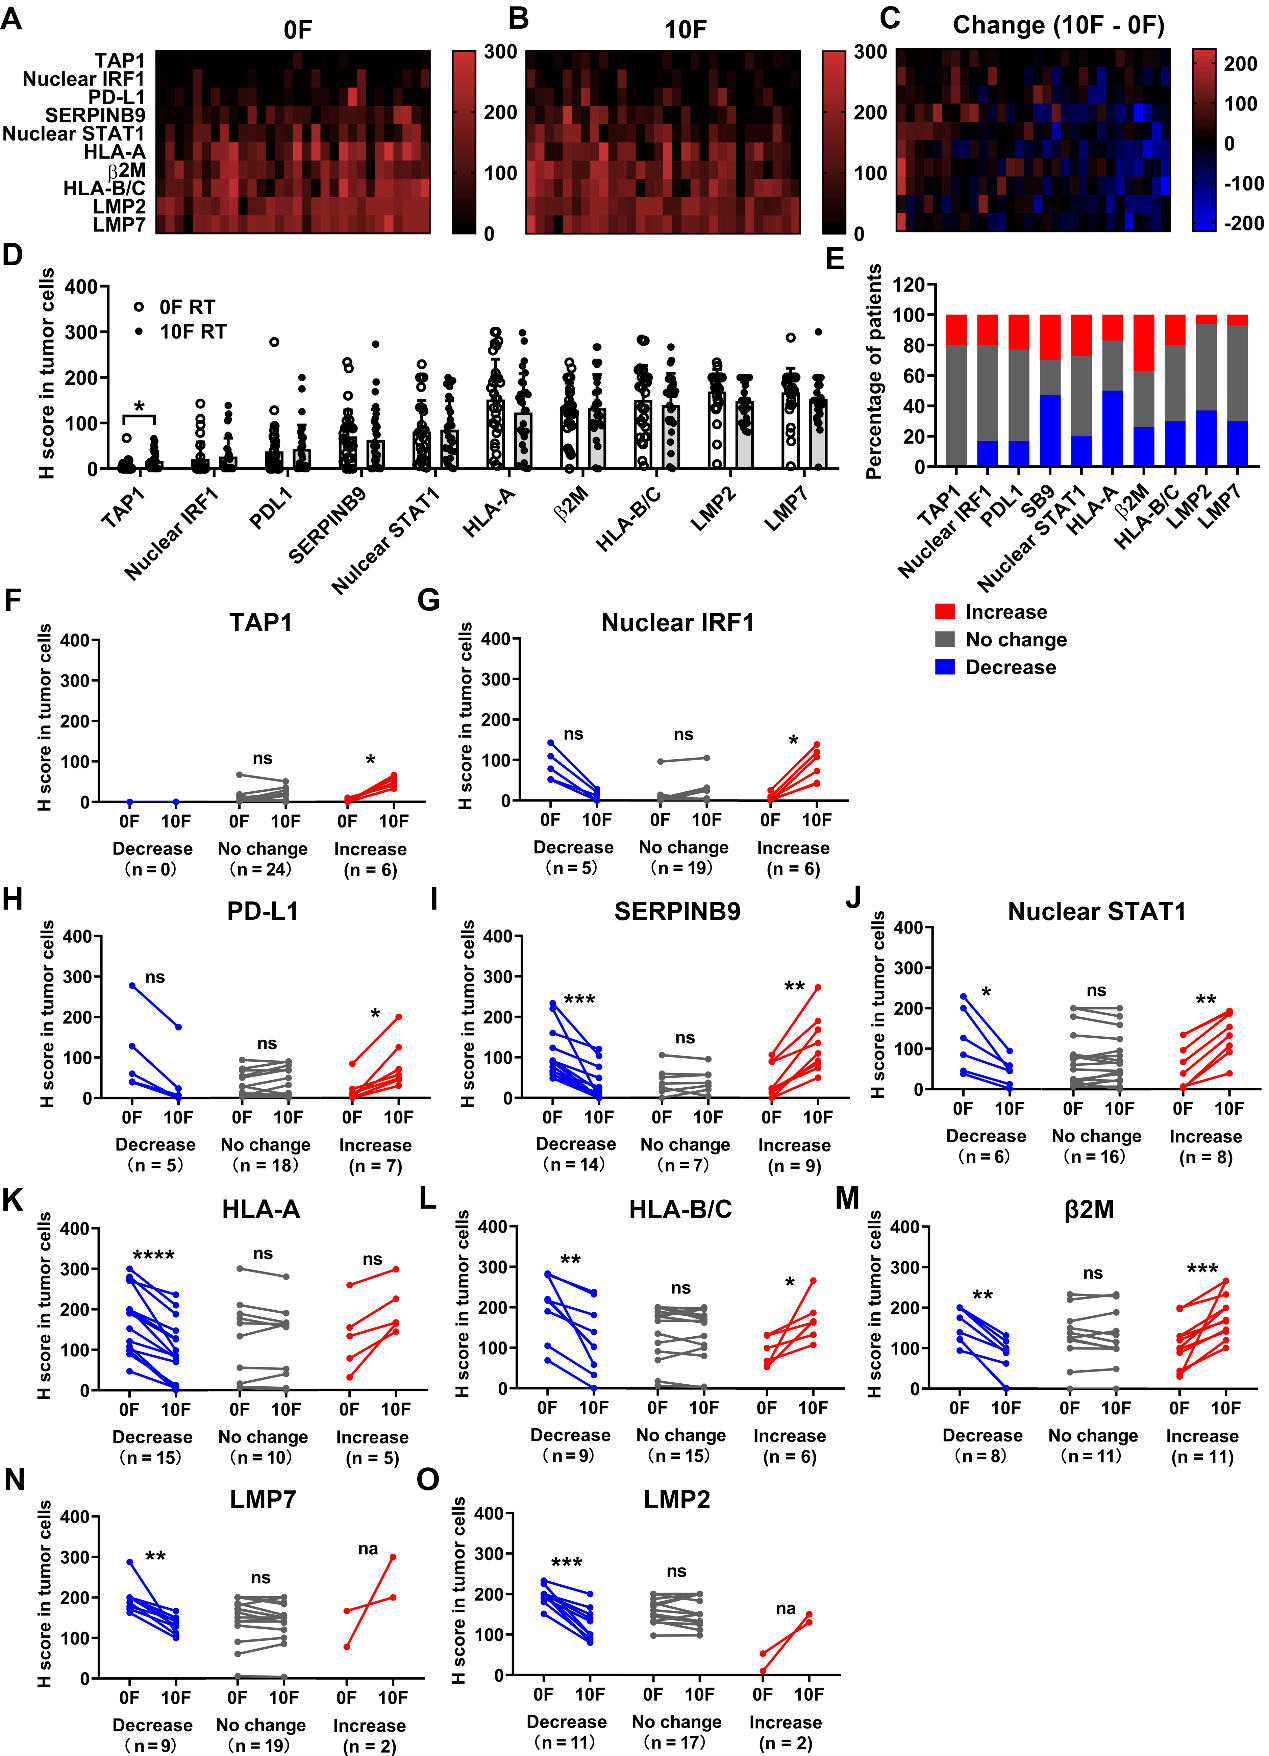


**Figure S9. Immune marker expression H score in tumor cells before and during CCRT.**

Heatmaps of expression H score of indicated immune markers in tumor cells before (A) and after 10 fractions (F) of radiotherapy (B), and their dynamic changes (C). Patients were ranked according to their mean changes of H score from the highest on the left to the lowest on the right. Markers were ranked according to their mean H score of the whole cohort of patients from the lowest on the top to the highest on the bottom. The vertical color bars display the range of values. N = 30.

(D): Summary of the expression H score of these markers in tumor cells before and after 10F RT.

(E): Summary of the change (10F vs 0F) patterns (increase, no change and decrease) of these markers. Increase (in red): H score increased by > 30; Decrease (in blue): H score decreased by > 30; No change (in gray): Changes of H score ≤ 30.

Comparisons of marker expression H score before and after 10F RT in subgroups with different patterns of change (decrease, no change and increase) are summarized in (F-O). The markers and case numbers (N) for each change pattern are indicated.

Mean comparisons in (D) (paired groups with normal distribution) were performed using the paired Student’s t test. Mean comparison in (F-O (paired groups with uncertain distribution normality) was performed using the Wilcoxon matched-pairs signed rank test.

ns: P > 0.05; * P < 0.05; ** P < 0.01; *** P < 0.001, **** P< 0.0001; na: the comparison is not applicable. P values are not shown if they are > 0.05 in (D).


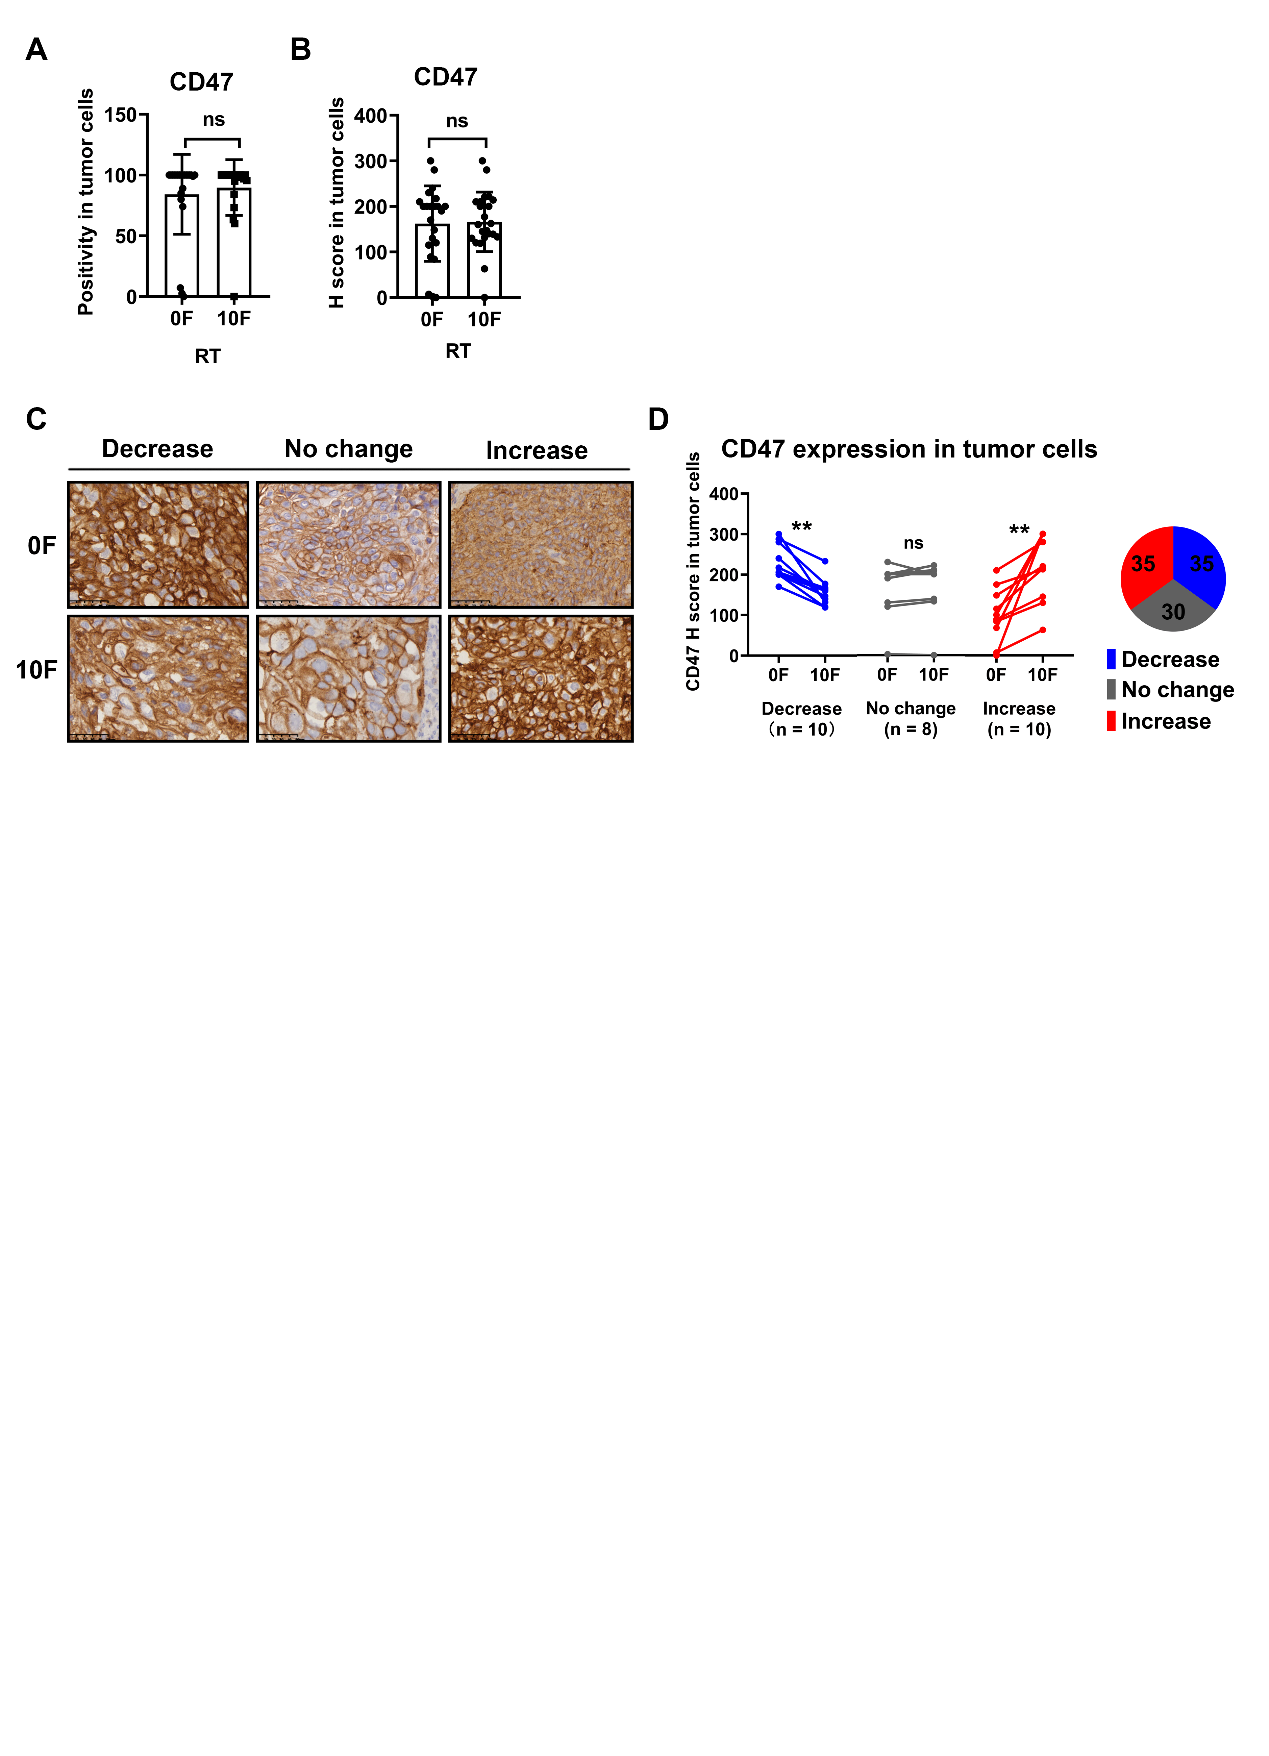


**Figure S10. CD47 expression in tumor cells in CC patients receiving CCRT.**

CD47 expression (positivity and H score) in tumor cells is summarized in (A) and (B).

Various dynamic expression changes (decrease, no change and increase) of CD47 in tumor cells: representative immunohistochemical staining in (C), H score comparison in subgroups of patients with various change patterns and their percentage in (D).

Mean comparisons were performed by using the paired Student’s t test in paired groups with normal distribution (A and B) and the Wilcoxon matched-pairs signed rank test in paired groups with uncertain distribution normality (D) (ns: P > 0.05; ** P < 0.01).


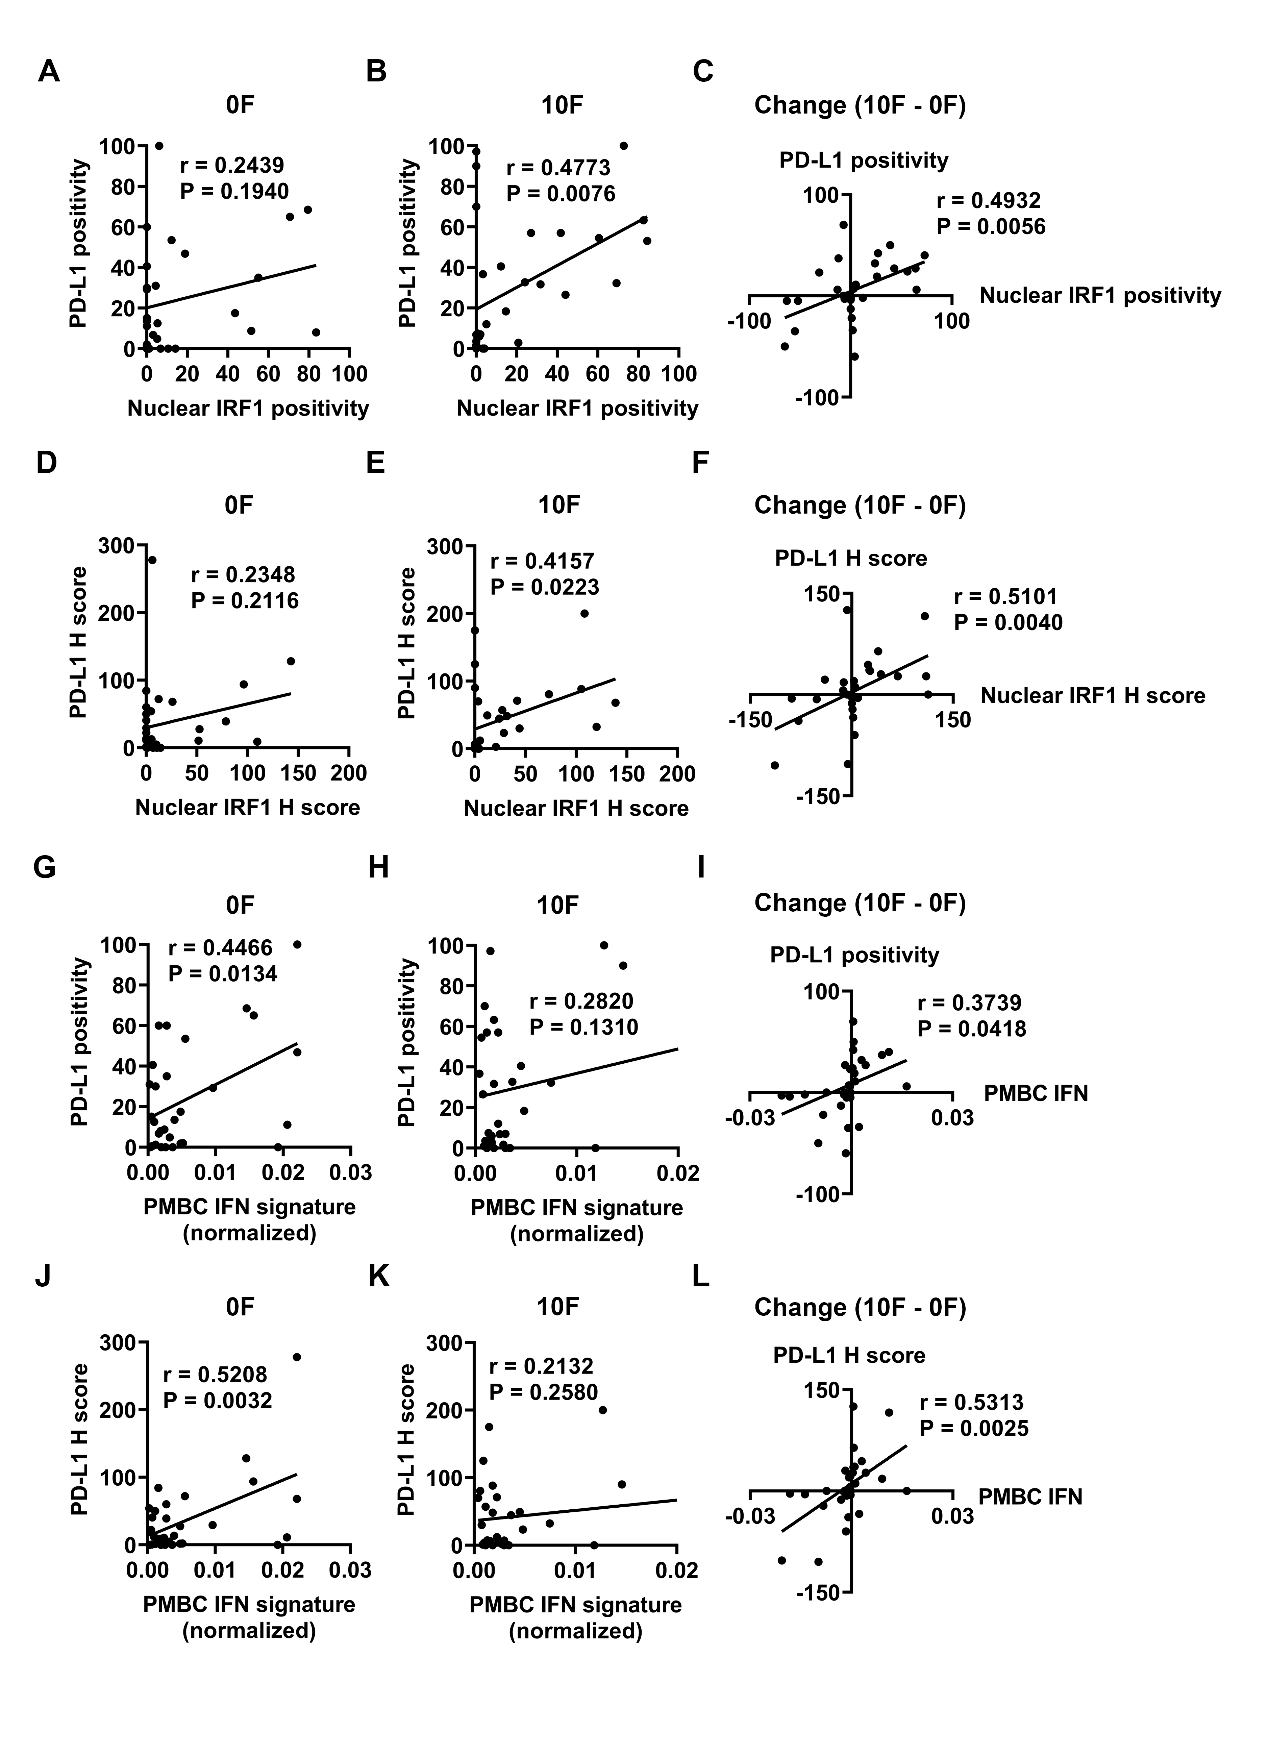


**Figure S11. The expression correlation between PD-L1 and nuclear IRF1 staining in tumor cells, and the PMBC IFN gene signature**

The expression positivity of PD-L1 and nuclear IRF1 in tumor cells before and after 10F RT, and their dynamic changes were plotted in (A-C).

The expression H score of PD-L1 and nuclear IRF1 in tumor cells before and after 10F RT, and their dynamic changes were plotted in (D-F).

The expression of PD-L1 positivity in tumor cells and the PMBC IFN gene before and after 10F RT, and their dynamic changes were plotted in (G-I).

The expression of PD-L1 H score in tumor cells and the PMBC IFN gene before and after 10F RT, and their dynamic changes were plotted in (J-L).

The expression correlation between markers was evaluated by Pearson’s correlation. Correlation coefficients and P values are indicated.


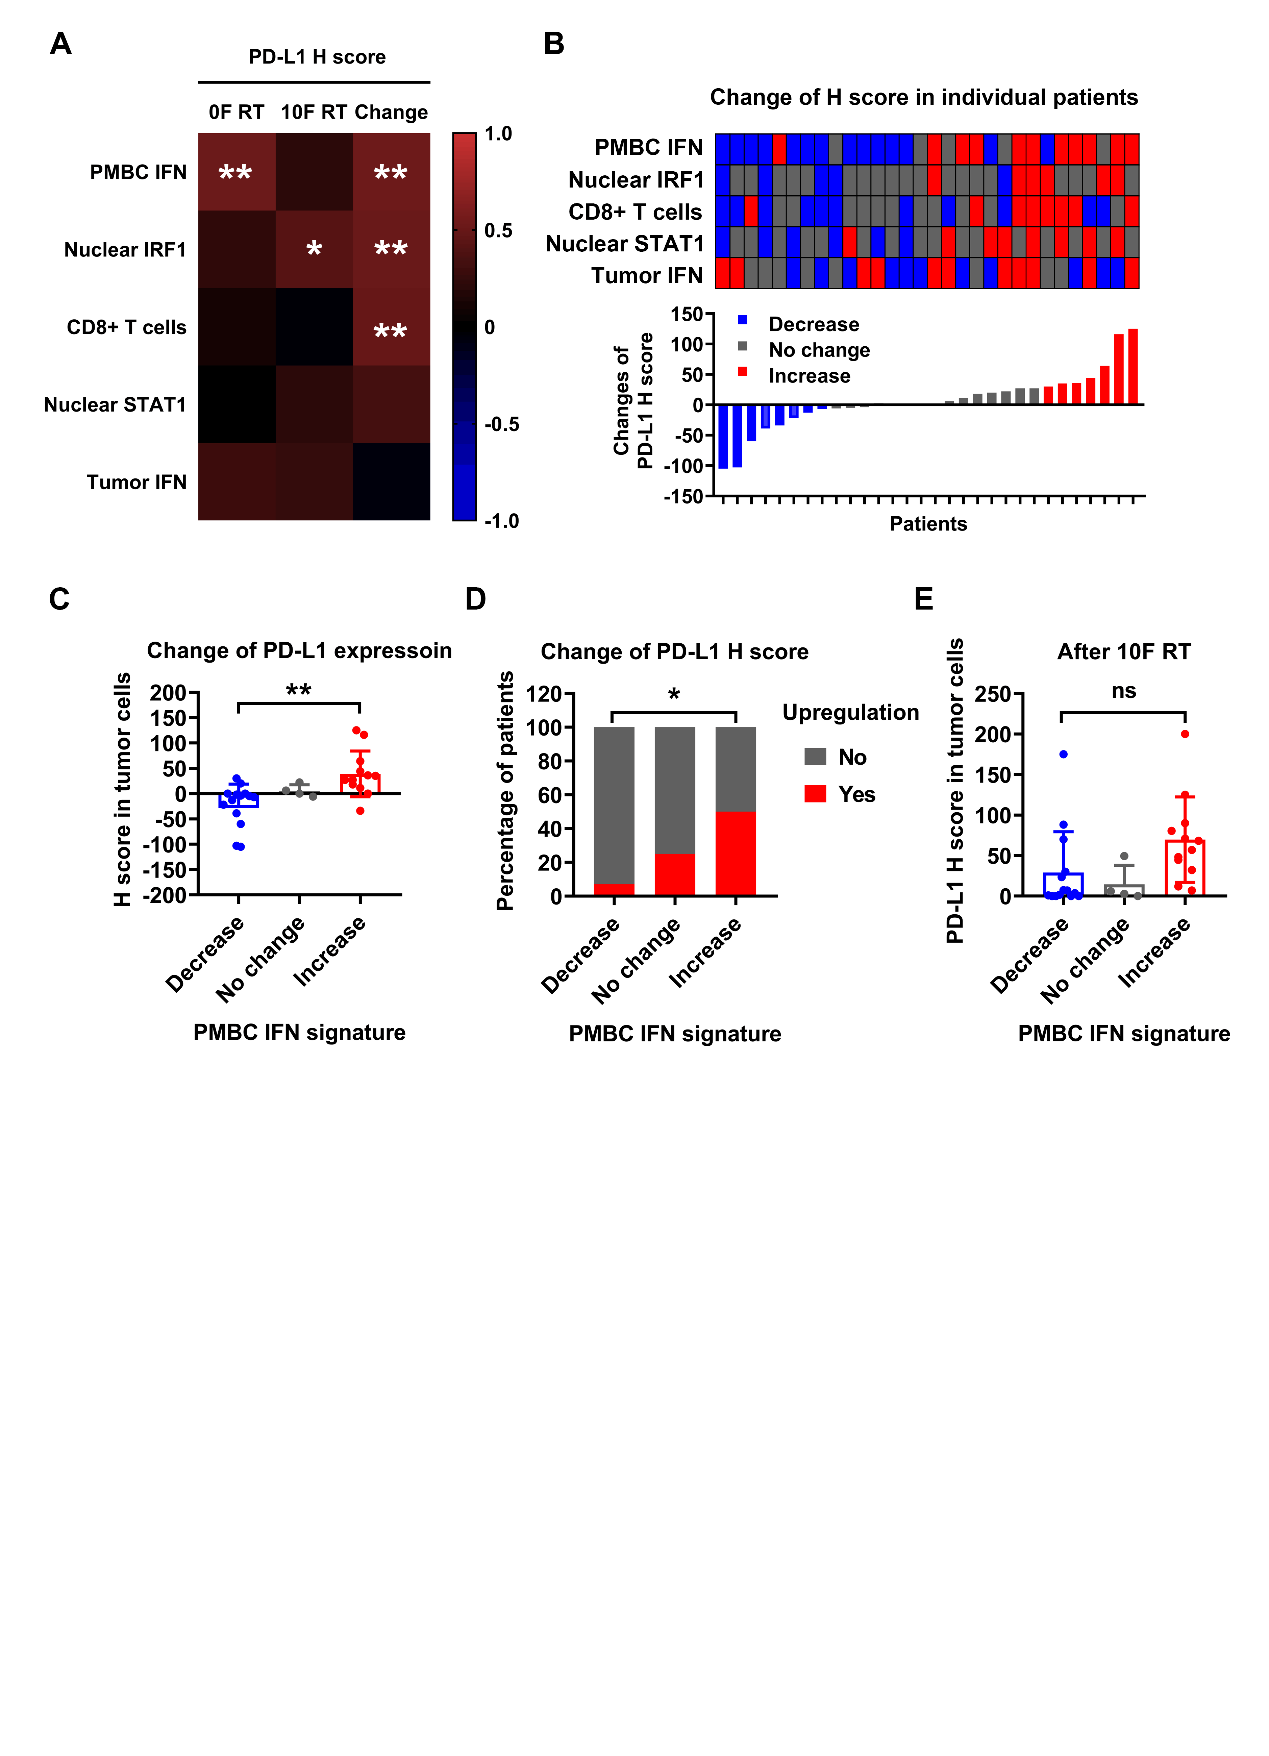


**Figure S12. PD-L1 expression (H score) correlates with tumor cell nuclear IRF1 staining and the IFN gene expression signature of PMBCs during CCRT.**

(A): Heatmap of Pearson correlation coefficients between the expression of PD-L1 (H score in tumor cells before and after 10F RT and their dynamic change) and various immune markers.

(B): The change of PD-L1 H score in tumor cells after RT was displayed in the lower panel as a waterfall plot, ranking from the greatest decrease on the left to the greatest increase on the right. The dynamic change patterns of expression positivity or level of indicated markers in each patient are shown as a heatmap in the upper panel (decrease in blue, no change in gray and increase in red).

The change of tumor cell PD-L1 H score, the percentage of patients with PD-L1 induction (increased H score in tumor cells), and the tumor cell PD-L1 H score after 10F RT in patients with different change patterns of the PMBC IFN signature are summarized in (C), (D) and (E), respectively.

Data in bar charts represent mean ± SD. Mean comparison was performed by using 1-way ANOVA with Tukey’s multiple-comparisons test in more than 2 groups. Ratio comparison was performed using the Chi-square test. The correlation between the expression of various markers was evaluated by Pearson’s correlation (ns: P > 0.05; *P < 0.05, ** P < 0.01. P > 0.05 was not shown in heatmaps).


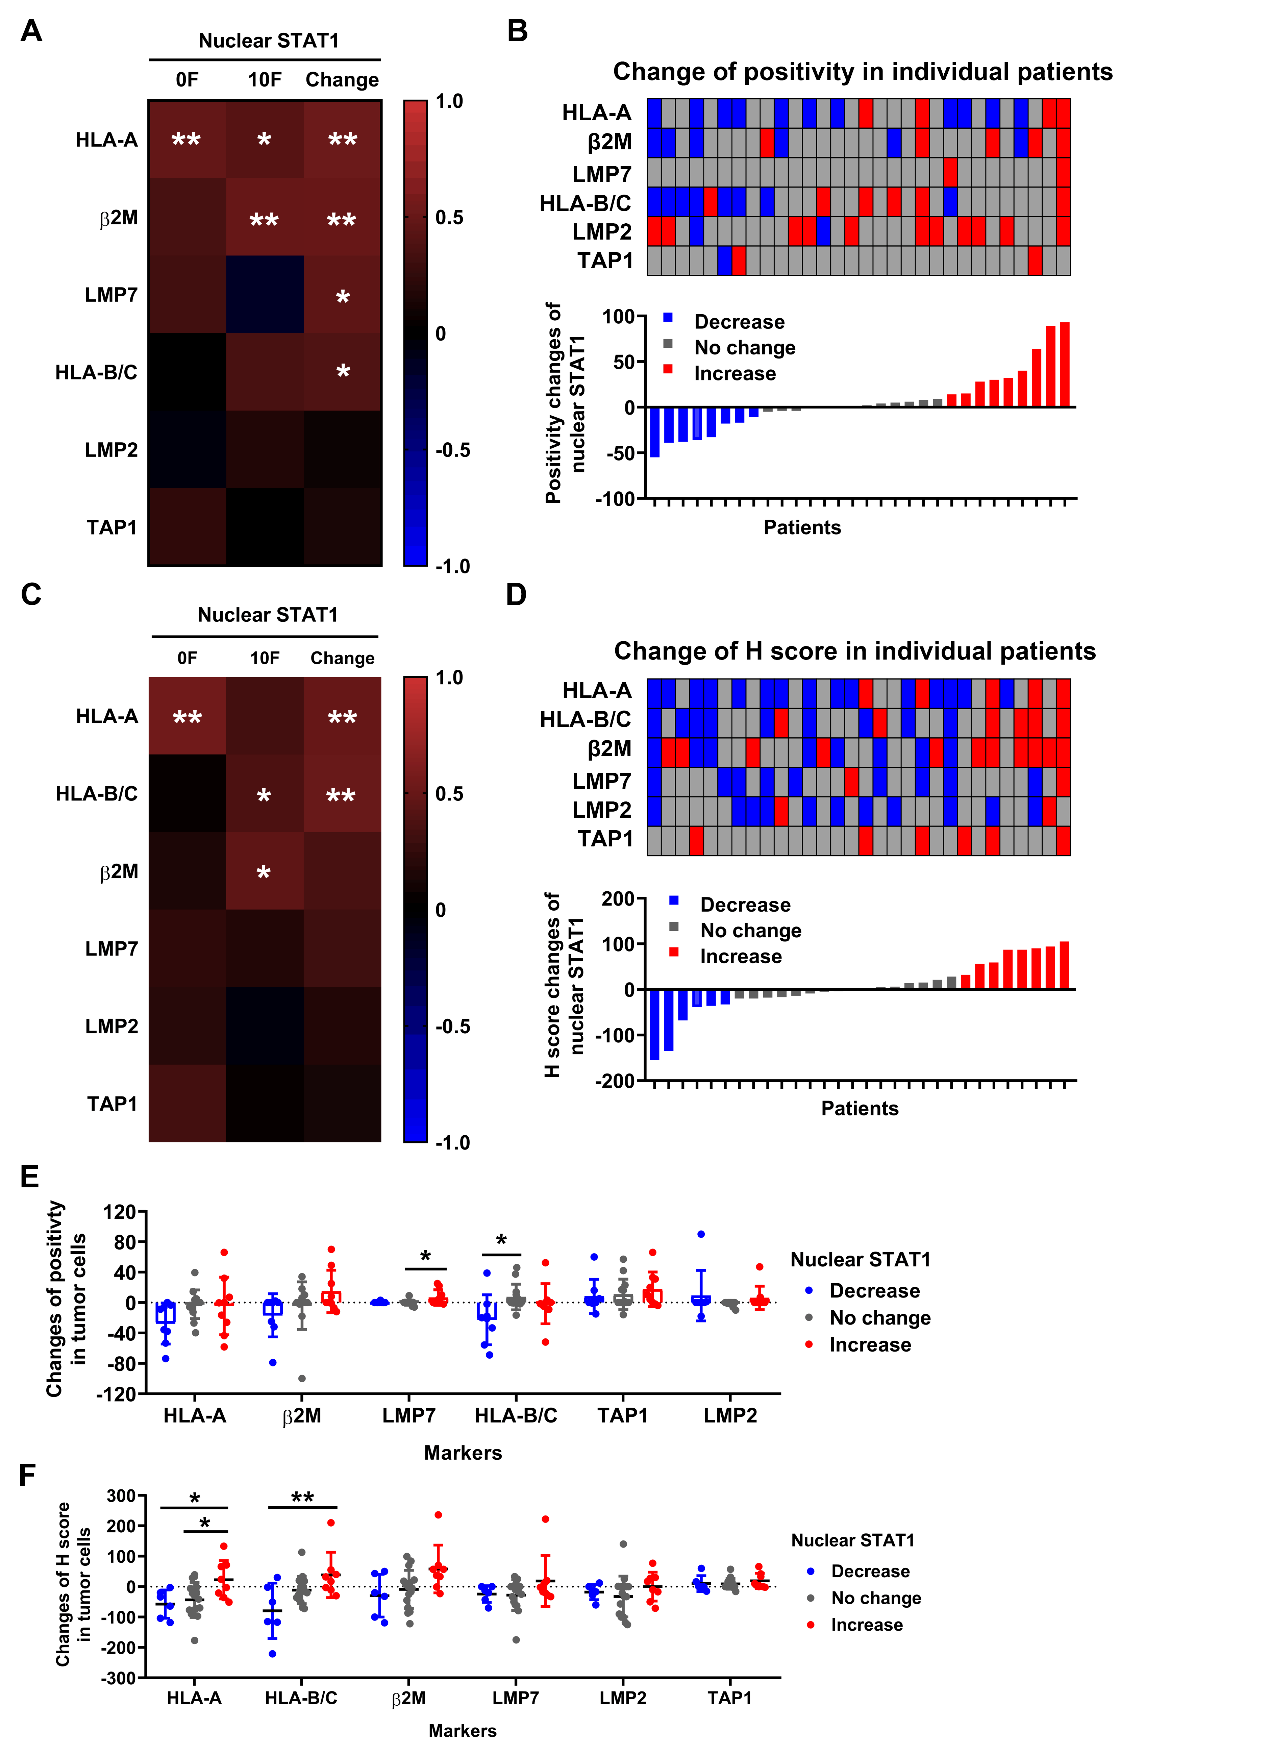


**Figure S13. AMP component expression correlates with STAT1-mediated signaling in cancer cells during CCRT.**

Heatmaps of Pearson correlation coefficients between expression (positivity and H score) of antigen presentation machinery (APM) components (positivity in tumor cells before and after 10F RT and their dynamic change) and various markers are shown in (A) and (C), respectively.

(B): The change of nuclear STAT1 positivity in tumor cells after RT is displayed in the lower panel as a waterfall plot, ranking from the greatest decrease on the left to the greatest increase on the right. The dynamic change patterns of expression positivity of APM components in each patient is shown as a heatmap on the upper panel (decrease in blue, no change in gray and increase in red).

(D): The change of nuclear STAT1 H score in tumor cells after RT is displayed on the lower panel as a waterfall plot, ranking from the greatest decrease on the left to the greatest increase on the right. The dynamic change patterns of expression H score of APM components in each patient is shown as a heatmap in the upper panel (decrease in blue, no change in gray and increase in red).

Expression (positivity and H score) changes of APM components in tumor cells in patients with different change patterns of nuclear STAT1 are shown in (E) and (F), respectively.

Data in bar charts represent mean ± SD. Mean comparison was performed by using 1-way ANOVA with Tukey’s multiple-comparisons test. The correlation between the expression of various markers was evaluated by Pearson’s correlation (*P < 0.05 and ** P < 0.01). P > 0.05 was not shown.


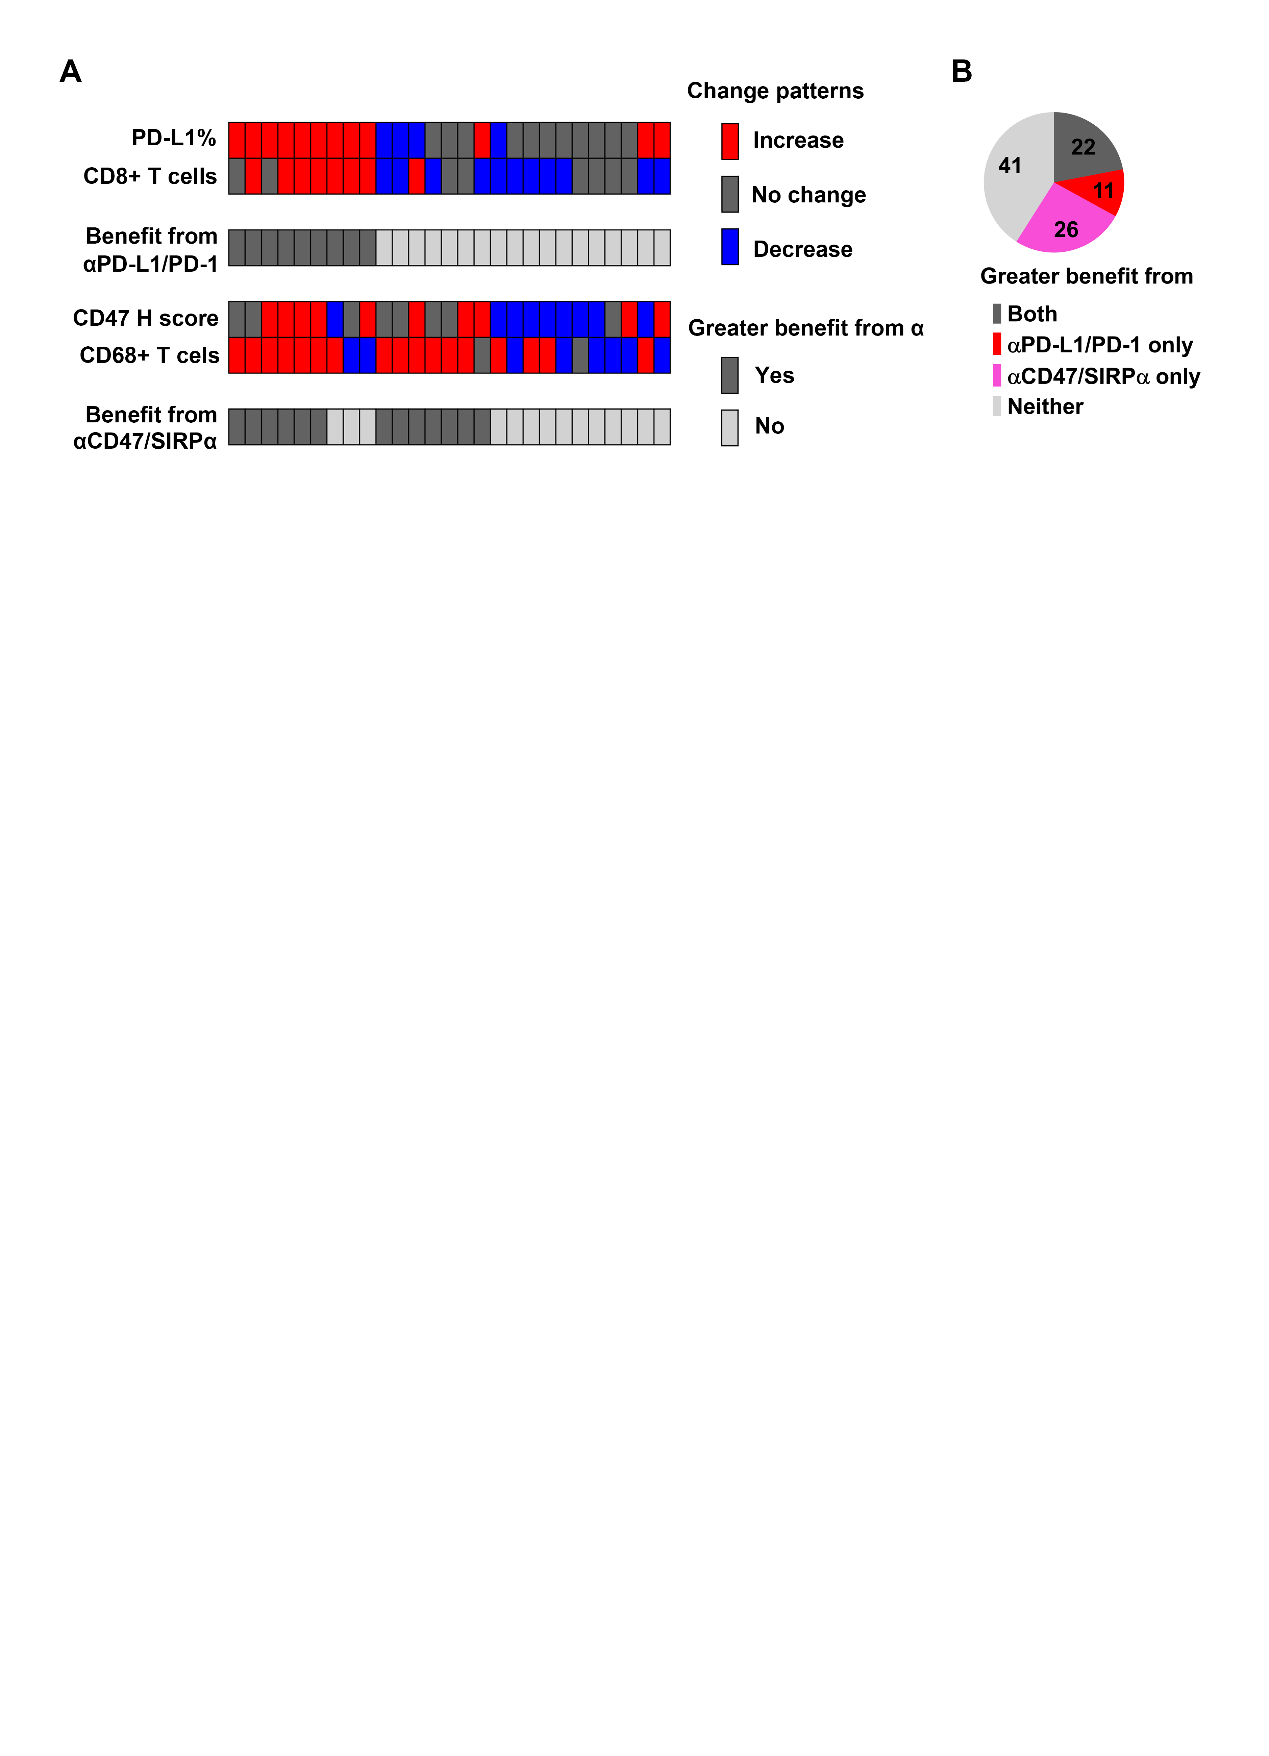


**Figure S14. Estimated benefit from adding ICB to CRT in CC patients**

(A) The first and second rows: dynamic change patterns of PD-L1 positivity in tumor cells and tumor infiltrating CD8+ T cell number in individual patients after 10F RT; The third row: the potential of greater benefit of from αPD-L1/PD-1 in each patient after RT; The fourth and fifth rows: dynamic change patterns of CD47 positivity in tumor cells and tumor infiltrating macrophage number in individual patients after 10F RT; The seventh row: the potential of greater benefit from αCD47/SIRPα in each patient after RT. Dynamic change patterns: decrease in blue, no change in gray and increase in red. Greater benefit: Yes in gray and No in white.

(B) Percentages of patients with greater benefit from αPD-L1/PD-1, αCD47/SIRPα, both or neither after 10F RT.
